# Supplementary material for: Optimising thermochemical energy storage: a comprehensive analysis of CaCO3 composites with CaSiO3, CaTiO3, and CaZrO3
Source: Royal Society of Chemistry journal article supplement (doi:10.1039/d4cp01144a), 2024-01-01
Supplement: d4cp01144a1.pdf [file d4cp01144a1.pdf]

## Supplementary information

for

### Optimising Thermochemical Energy Storage: A Comprehensive Analysis of $\text{CaCO}_3$ composites with $\text{CaSiO}_3$ , $\text{CaTiO}_3$ , and $\text{CaZrO}_3$

Terry D. Humphries,<sup>1\*</sup> Adriana P. Vieira,<sup>1</sup> Yurong Liu,<sup>1</sup> Eleanor McCabe,<sup>1</sup> Mark Paskevicius,<sup>1</sup>  
Craig E. Buckley.<sup>1</sup>

<sup>1</sup>Physics and Astronomy, Curtin University, GPO Box U1987, Perth, WA 6845, Australia.

\*E-mail: [terry\\_humphries81@hotmail.com](mailto:terry_humphries81@hotmail.com)

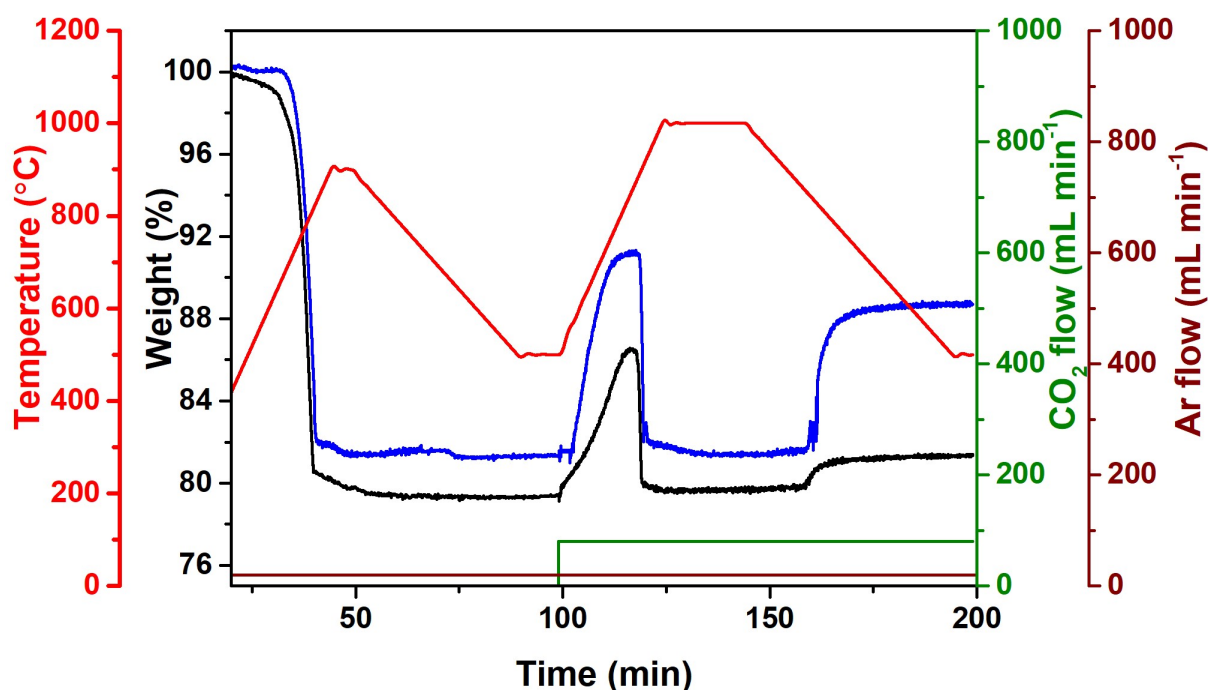

**Fig. S1.** TGA for  $\text{CaCO}_3$ - $\text{CaSiO}_3$  (black line) and  $\text{CaCO}_3$ - $\text{CaTiO}_3$  (blue line) under argon (brown line) and  $\text{CO}_2$  atmosphere (green line).

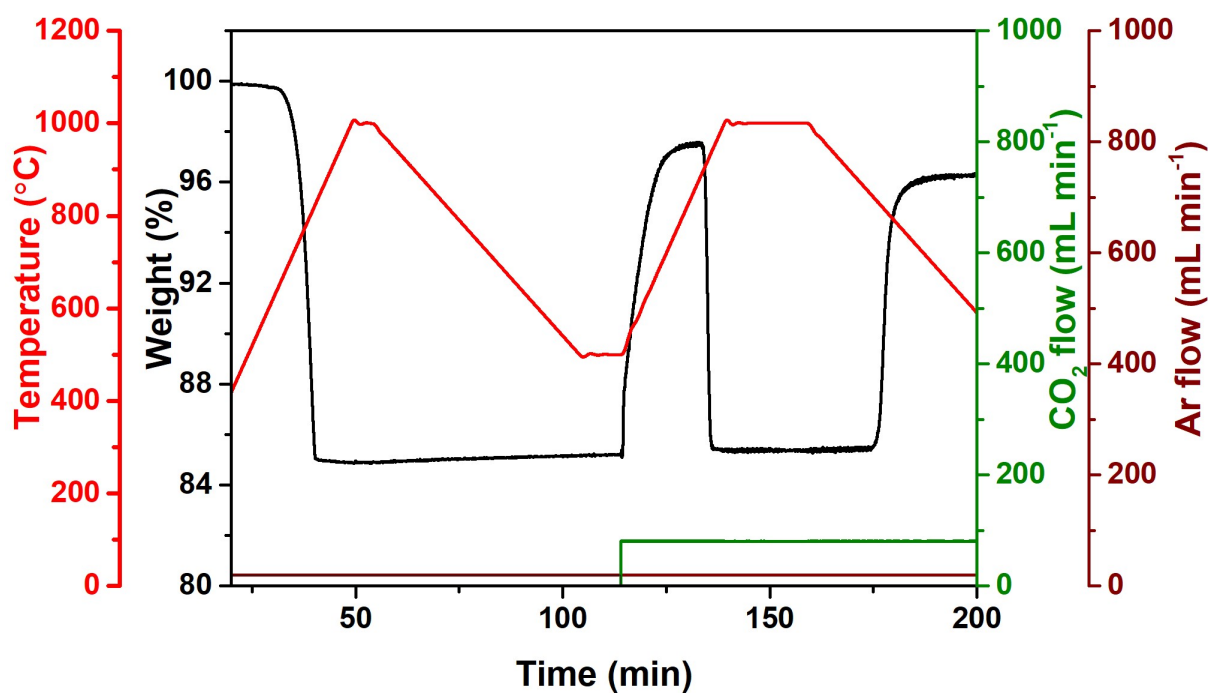

**Fig. S2.** TGA for CaCO<sub>3</sub>-CaZrO<sub>3</sub> under argon and CO<sub>2</sub> atmosphere.

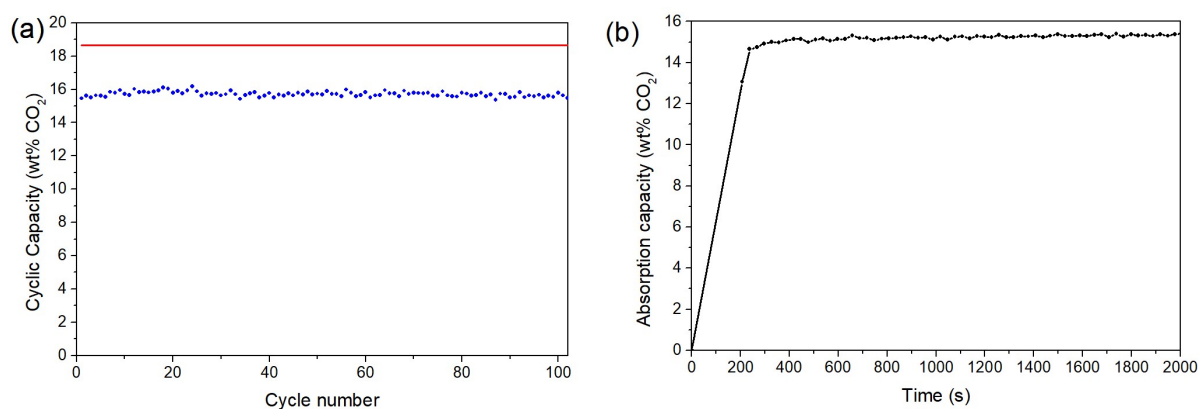

**Fig. S3.** CO<sub>2</sub> cycling of CaCO<sub>3</sub>-CaTiO<sub>3</sub> on a manometric Sieverts apparatus. (a) Carbon dioxide sorption capacity (blue) over 102 cycles relative to the theoretical maximum sorption capacity (red). (b) CO<sub>2</sub> absorption kinetics on cycle 102. Temperature = 752 °C; Absorption pressure = 5.45 bar; Desorption pressure = dynamic vacuum.

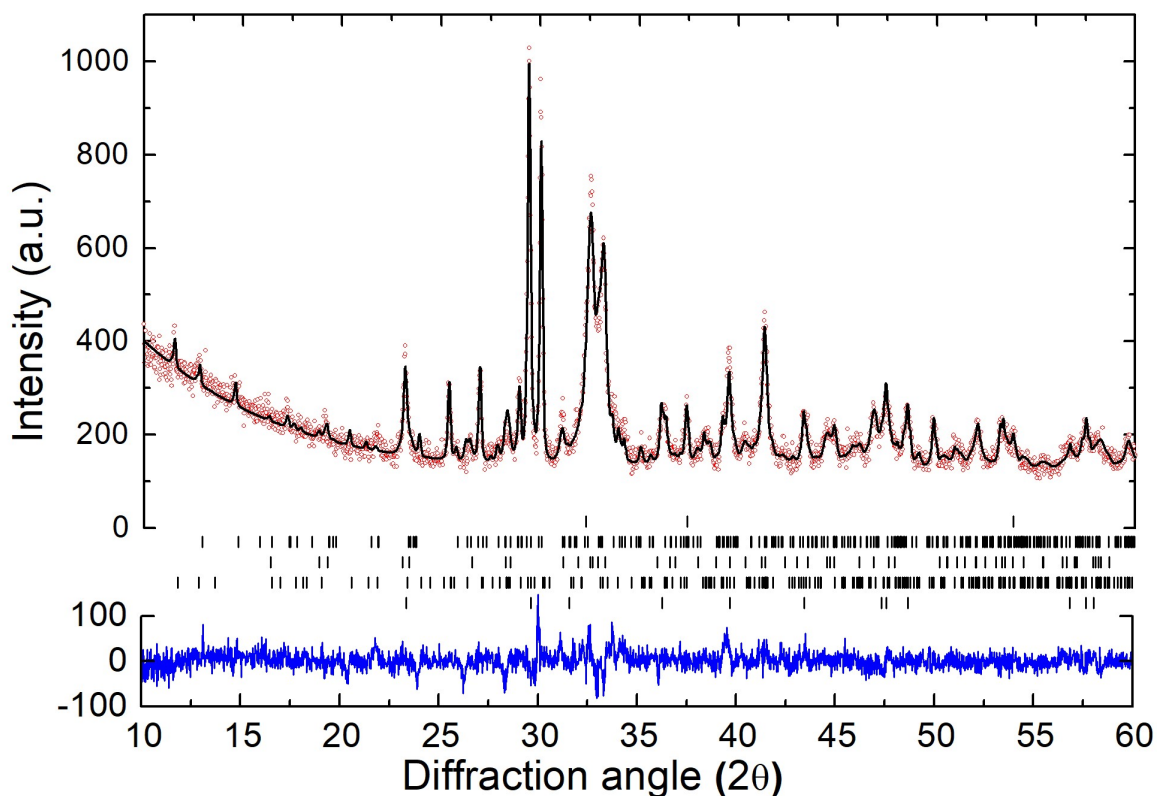

**Fig. S4.** Room temperature SR-XRD pattern and Rietveld refinement plot of  $\text{CaCO}_3$ - $\text{CaSiO}_3$  after  $\text{CO}_2$  cycling (14 cycles, final stage: absorption).  $R_{wp} = 8.9\%$ . Experimental data as red circles, calculated diffraction pattern as black line and the difference plot in blue. Tick marks show positions for:  $\text{CaCO}_3$  (16.1(3) wt%),  $\text{CaSiO}_3$  (25.1(4) wt%),  $\text{Ca}_2\text{SiO}_4$  (46.6(5) wt%),  $\text{Ca}_5(\text{SiO}_4)_2\text{CO}_3$  (10.1(4) wt%) and  $\text{CaO}$  (2.2(1) wt%), bottom to top respectively.  $\lambda = \text{Cu K}\alpha_{1,2}$  radiation.

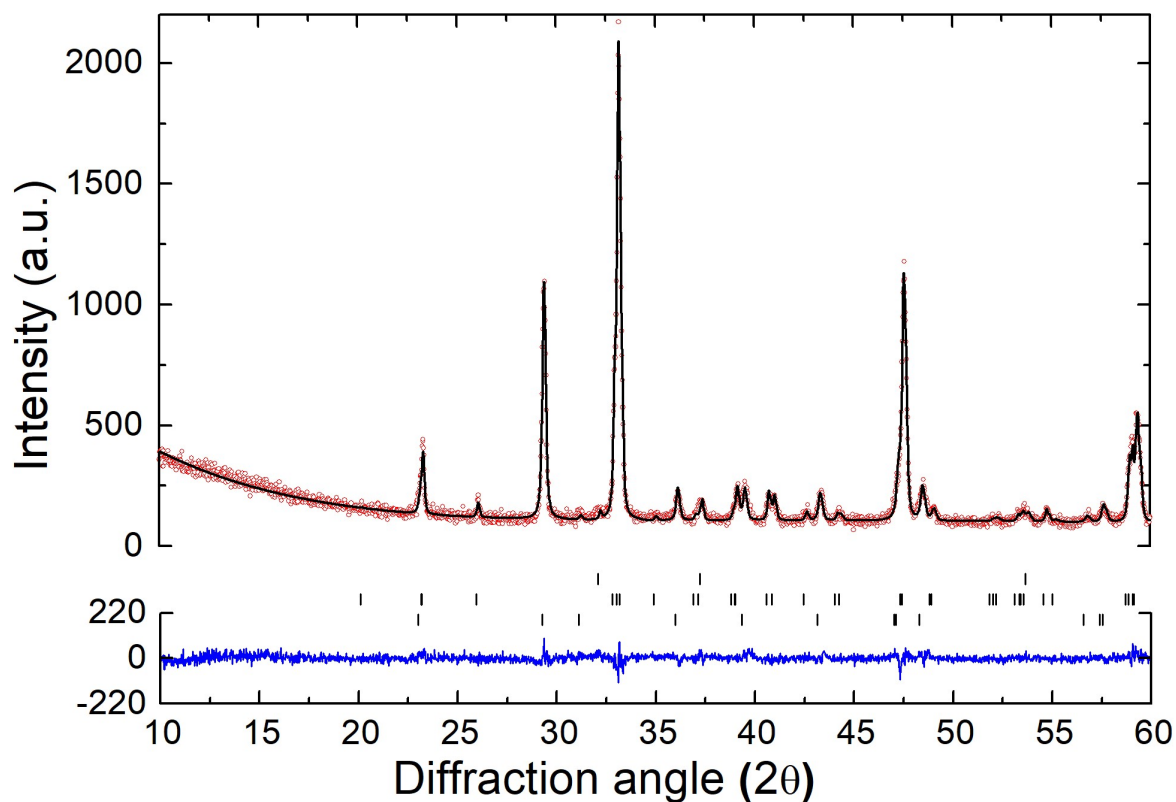

**Figure S5.** Room temperature SR-XRD pattern and Rietveld refinement plot of  $\text{CaCO}_3\text{-CaZrO}_3$  after  $\text{CO}_2$  cycling (100 cycles, final stage: absorption).  $R_{wp} = 7.7\%$ . Experimental data as red circles, calculated diffraction pattern as black line and the difference plot in blue. Tick marks show positions for:  $\text{CaCO}_3$  (30.8(3) wt%),  $\text{CaTiO}_3$  (68.0(3) wt%), and  $\text{CaO}$  (1.14(8) wt%), bottom to top respectively.  $\lambda = \text{Cu K}\alpha_{1,2}$  radiation.

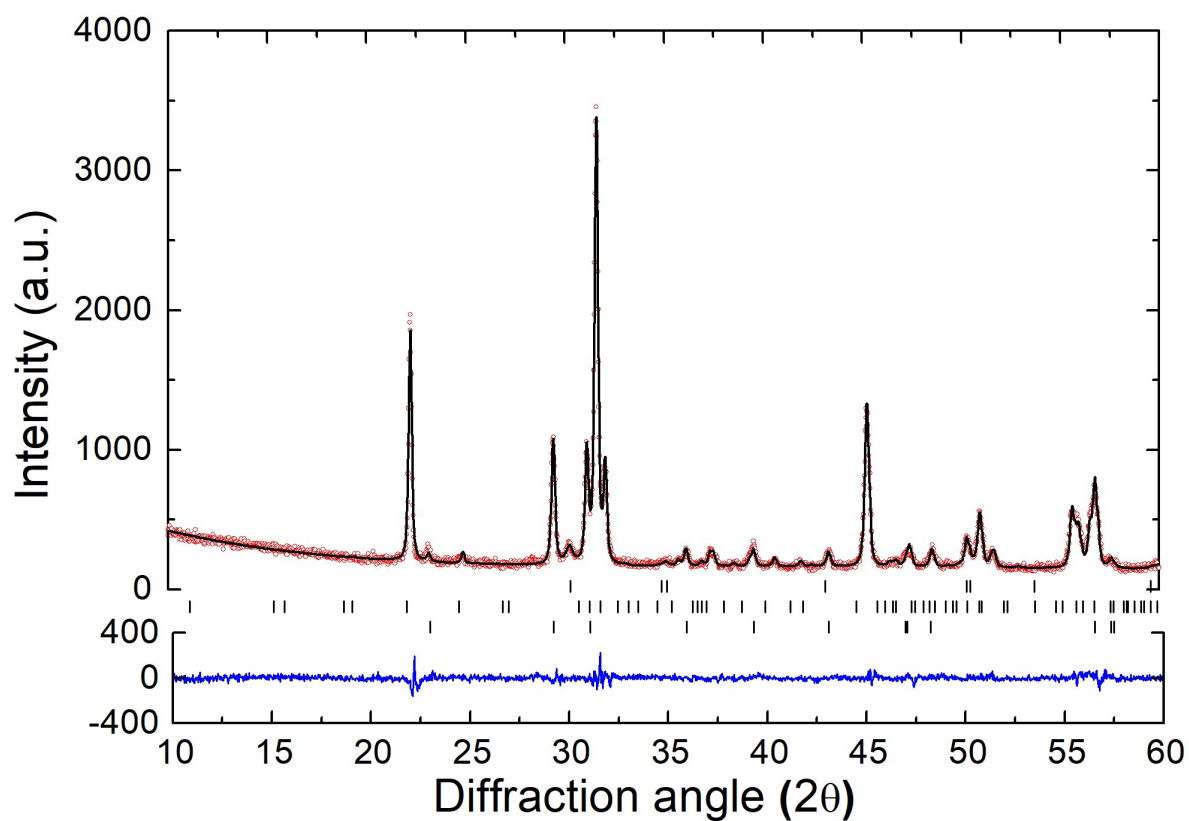

**Figure S6.** Room temperature SR-XRD pattern and Rietveld refinement plot of CaCO<sub>3</sub>-CaZrO<sub>3</sub> after CO<sub>2</sub> cycling (100 cycles, final stage: absorption).  $R_{wp} = 7.7\%$ . Experimental data as red circles, calculated diffraction pattern as black line and the difference plot in blue. Tick marks show positions for: CaCO<sub>3</sub> (29.2(3) wt%), CaZrO<sub>3</sub> (67.8(3) wt%), and ZrO<sub>2</sub> (3.0(2) wt%), bottom to top respectively.  $\lambda = \text{Cu K}\alpha_{1,2}$  radiation.

|                                                    | Molten salt<br>(40NaNO <sub>3</sub> :60KNO <sub>3</sub> ) | SrCO <sub>3</sub> + SrSiO <sub>3</sub> ⇌<br>Sr <sub>2</sub> SiO <sub>4</sub> + CO <sub>2</sub> | BaCO <sub>3</sub> + BaSiO <sub>3</sub> ⇌<br>Ba <sub>2</sub> SiO <sub>4</sub> + CO <sub>2</sub> | CaCO <sub>3</sub> ⇌ CaO + CO <sub>2</sub><br>(20 wt% Al <sub>2</sub> O <sub>3</sub> ) | CaCO <sub>3</sub> + CaSiO <sub>3</sub><br>⇌<br>Ca <sub>2</sub> SiO <sub>4</sub> + CO <sub>2</sub> | CaCO <sub>3</sub> + CaTiO <sub>3</sub><br>⇌<br>CaO + CaTiO <sub>3</sub> +<br>CO <sub>2</sub> | CaCO <sub>3</sub> + CaZrO <sub>3</sub> ⇌<br>CaO + CaZrO <sub>3</sub> +<br>CO <sub>2</sub> |
|----------------------------------------------------|-----------------------------------------------------------|------------------------------------------------------------------------------------------------|------------------------------------------------------------------------------------------------|---------------------------------------------------------------------------------------|---------------------------------------------------------------------------------------------------|----------------------------------------------------------------------------------------------|-------------------------------------------------------------------------------------------|
| Enthalpy $\Delta H$ (kJ mol <sup>-1</sup> )        | 39.0                                                      | 155.8                                                                                          | 126.9                                                                                          | 172                                                                                   | 111 <sup>a</sup>                                                                                  | 169 <sup>b</sup>                                                                             | 152 <sup>a</sup>                                                                          |
| Density (g cm <sup>-3</sup> )                      | 2.17                                                      | 3.75 <sup>c</sup>                                                                              | 4.4 <sup>c</sup>                                                                               | 2.89                                                                                  | 2.77 <sup>c,d</sup>                                                                               | 3.51 <sup>c,d</sup>                                                                          | 3.59 <sup>c,d</sup>                                                                       |
| CO <sub>2</sub> Capacity (wt%)                     | -                                                         | 14.13                                                                                          | 10.71                                                                                          | 16.1                                                                                  | 20.35                                                                                             | 18.56                                                                                        | 15.75                                                                                     |
| Gravimetric Energy Density (kJ kg <sup>-1</sup> )  | 413                                                       | 500                                                                                            | 309                                                                                            | 782                                                                                   | 513                                                                                               | 716                                                                                          | 544                                                                                       |
| Gravimetric Energy Density (kWh kg <sup>-1</sup> ) | 0.115                                                     | 0.14                                                                                           | 0.09                                                                                           | 0.22                                                                                  | 0.14                                                                                              | 0.20                                                                                         | 0.16                                                                                      |
| Volumetric Energy Density (MJ m <sup>-3</sup> )    | 895                                                       | 1876                                                                                           | 1359                                                                                           | 2260                                                                                  | 1422                                                                                              | 2513                                                                                         | 1953                                                                                      |
| Volumetric Energy Density (kWh m <sup>-3</sup> )   | 249                                                       | 521                                                                                            | 378                                                                                            | 628                                                                                   | 394                                                                                               | 698                                                                                          | 542                                                                                       |
| Operating Temperature (°C)                         | 290 – 565                                                 | 700                                                                                            | 850                                                                                            | 900                                                                                   | 750                                                                                               | 750                                                                                          | 750                                                                                       |
| Operating CO <sub>2</sub> Pressure (bar)           | -                                                         | 0.1 - 6.0                                                                                      | 5 – 25                                                                                         | 1                                                                                     | 0.1-1                                                                                             | 0.1-1                                                                                        | 0.1-1                                                                                     |
| Theoretical Carnot Efficiency (%) <sup>e</sup>     | 46                                                        | 69                                                                                             | 73                                                                                             | 74                                                                                    | 70                                                                                                | 70                                                                                           | 70                                                                                        |
| Estimated Practical Efficiency (%) <sup>f</sup>    | 27                                                        | 44                                                                                             | 48                                                                                             | 49                                                                                    | 46                                                                                                | 46                                                                                           | 46                                                                                        |
| Mass Required (tonnes) <sup>f</sup>                | 11.6                                                      | 5.8                                                                                            | 8.7                                                                                            | 3.4                                                                                   | 5.5                                                                                               | 4.0                                                                                          | 5.2                                                                                       |
| Volume Required (m <sup>3</sup> ) <sup>f</sup>     | 5.3                                                       | 1.6                                                                                            | 2.0                                                                                            | 1.2                                                                                   | 2.0                                                                                               | 1.1                                                                                          | 1.4                                                                                       |
| Materials Cost (\$ tonne <sup>-1</sup> )           | 630                                                       | 1,060                                                                                          | 1,090                                                                                          | 84.3                                                                                  | 260                                                                                               | 2,200                                                                                        | 4,664                                                                                     |
| Total Materials Cost Required (\$) <sup>f</sup>    | 7,297                                                     | 6,185                                                                                          | 9,471                                                                                          | 283                                                                                   | 1,434                                                                                             | 8,697                                                                                        | 24,264                                                                                    |
| Material cost (US\$ per kWh <sub>th</sub> )        | 5.7                                                       | 7.6                                                                                            | 12.7                                                                                           | 0.4                                                                                   | 1.8                                                                                               | 11.1                                                                                         | 30.9                                                                                      |

<sup>a</sup> This work, DSC data. <sup>b</sup> This work, PCI data. <sup>c</sup> Intrinsic density. <sup>d</sup> Applies to the mixture. <sup>e</sup> Lower temperature of 30°C. <sup>f</sup> To generate 360 kWh of electrical energy. The conversion of thermochemical energy ( $E_{th}$ ) to electrical energy ( $E_c$ ) is  $E_c = e_p \times E_{th}$ , where  $e_p$  is the estimated practical efficiency. Assuming 100 % cycling capacity, except CaCO<sub>3</sub> ⇌ CaO + CO<sub>2</sub> (20 wt% Al<sub>2</sub>O<sub>3</sub>) which assumes 45.7 % as in ref. <sup>2</sup>

**Table S1** Comparison of thermochemical properties, system variables, and cost parameters for select energy storage materials.<sup>1-6</sup>



### Assumptions for Cost Analysis:

- According to the assumptions listed in Lazard's Levelised Cost of Storage Analysis, the useful plant lifetime is a span of 20 years to 40 years.<sup>7</sup>
- Equipment for system – 1 x compressor, 2 x intercoolers, 2 x turbine, electrical heater, 1 x CO<sub>2</sub> storage vessel, 1 x thermocline vessel
- Additional costs include feedstock and maintenance.
- Cost of electricity is 0.1\$/kWh.<sup>8</sup>
- Cost of solar PV per kW is \$750 USD, and is included in CAPEX.<sup>9</sup>
- System costs are calculated using Cost of Individual Equipment – Chemical Process Equipment.<sup>10</sup>

**Table S2** CAPEX costs associated with plant.<sup>7</sup>

| <b>Component</b>            | <b>Cost (\$USD)</b> |
|-----------------------------|---------------------|
| Compressor                  | 15,007.50           |
| Heat Exchanger              | 14,532              |
| Turbine                     | 575.15              |
| Pressure Vessel             | 1,811.90            |
| Thermocline Vessel          | 4,079.50            |
| Stirling Engine Cost        | 14,000              |
| Reactor Vessel              | 1,427.40            |
| Heater Cost                 | 2,102               |
| Cost of CO <sub>2</sub>     | 150                 |
| Cost of Solar PV            | 78,240              |
| Insulation                  | 2,800               |
| Balance of Plant            | 4,600               |
| Initial Investment of Plant | 7,920               |
| <b>Total</b>                | <b>145,818.05</b>   |



**Table S3** OPEX Costs associated with plant.<sup>7</sup>

| <b>System</b>                        | <b>Power Consumption (kW)</b> | <b>Cost (USD)</b> |
|--------------------------------------|-------------------------------|-------------------|
| CO <sub>2</sub> compressor           | 8.82                          | \$ 10.58          |
| Heater                               | 75.00                         | \$ 90.00          |
| Intercooler Charging                 | 16.00                         | \$ 19.20          |
| Intercooler Discharging              | 4.50                          | \$ 5.40           |
| <b>Total 12 Hours</b>                |                               | \$ 125.18         |
| <b>Total Yearly</b>                  |                               | \$ 45,692.16      |
| <b>Total Plant Lifetime 40 Years</b> |                               | \$ 1,827,686.40   |
| <b>Total Plant Lifetime 20 Years</b> |                               | \$ 913,843.20     |
| <b>Total Energy Produced (kWh)</b>   |                               |                   |
| <b>40 Years</b>                      |                               | 5,256,000         |
| <b>Total Energy Produced (kWh)</b>   |                               |                   |
| <b>20 Years</b>                      |                               | 2,628,000         |

**Table S4** OPEX Costs associated with each energy storage material.<sup>7</sup>

| <b>System Operational Costs</b>            | <b>Cost USD</b> |
|--------------------------------------------|-----------------|
| Service Cost                               | \$ 864.00       |
| Operation and Maintenance Cost in 1st Year | \$ 158.40       |
|                                            |                 |
| CaTiO <sub>3</sub>                         | \$ 8,697.00     |
| <b>Total OPEX 40 Years</b>                 | \$ 390,323.00   |
| <b>Total OPEX 20 Years</b>                 | \$ 194,896.35   |
|                                            |                 |
| CaZrO <sub>3</sub>                         | \$ 24,264.00    |
| <b>Total OPEX 40 Years</b>                 | \$ 1,013,003.00 |
| <b>Total OPEX 20 Years</b>                 | \$ 506,236.35   |
|                                            |                 |
| CaSiO <sub>3</sub>                         | \$ 1,434.00     |
| <b>Total OPEX 40 Years</b>                 | \$ 99,803.00    |

|                            |              |
|----------------------------|--------------|
|                            |              |
| <b>Total OPEX 20 Years</b> | \$ 49,636.35 |

## References

1. T. D. Humphries, K. T. Møller, W. D. A. Rickard, M. V. Sofianos, S. Liu, C. E. Buckley and M. Paskevicius, *J. Mater. Chem. A*, 2019, **7**, 1206-1215.
2. K. T. Møller, A. Ibrahim, C. E. Buckley and M. Paskevicius, *J. Mater. Chem. A*, 2020, **8**, 9646-9653.
3. K. T. Møller, K. Williamson, C. E. Buckley and M. Paskevicius, *J. Mater. Chem. A*, 2020, **8**, 10935-10942.
4. A. P. Vieira, K. Williamson, T. D. Humphries, M. Paskevicius and C. E. Buckley, *J. Mater. Chem. A*, 2021, **9**, 20585-20594.
5. Metals Prices, <https://www.metal.com/>, (accessed December 11, 2023).
6. L. Desage, T. D. Humphries, M. Paskevicius and C. E. Buckley, *Journal of Energy Storage*, 2024, Submitted: DOI: 10.2139/ssrn.4561027.
7. LAZARD, *Lazard's Levelized Cost of Hydrogen Analysis*, 2021.
8. Australian Energy Regulator - Industry Charts, <https://www.aer.gov.au/industry/wholesale/charts>, (accessed December 20, 2023).
9. SOLARQUOTES AUSTRALIAN SOLAR PRICE INDEX, <https://www.solarquotes.com.au/price-explorer/>, (accessed March 06, 2024).
10. J. R. Couper, W. R. Penney, J. R. Fair and S. M. Walas, *Chemical Process Equipment (Third Edition)*, Butterworth-Heinemann, Boston, 2012.
